# Supplementary material for: Salivary levels of total huntingtin are elevated in Huntington’s disease patients
Source: PubMed Central journal article supplement (PMC5943337; doi:10.1038/s41598-018-25095-3), 2018-05-09
Supplement: 41598_2018_25095_MOESM1_ESM.pdf [file 41598_2018_25095_MOESM1_ESM.pdf]

**Title:** Salivary levels of total huntingtin are elevated in Huntington's disease patients

**Authors:** Jody Corey-Bloom<sup>1</sup>, Ameera Haque<sup>1</sup>, Sungmee Park<sup>1</sup>, Ajay Nathan<sup>1</sup>, Robert Baker<sup>2</sup>, Elizabeth A. Thomas<sup>2</sup>

**Affiliations:**<sup>1</sup> Department of Neurosciences, University of California, San Diego, CA,

<sup>2</sup>Department of Neuroscience, The Scripps Research Institute, La Jolla, CA.

\*To whom correspondence should be addressed:

Elizabeth A. Thomas, Ph.D.  
Department of Neuroscience  
The Scripps Research Institute  
10550 N. Torrey Pines Rd., SP2030  
La Jolla, CA.  
bthomas@scripps.edu

Figure S1. Western blot of Htt protein in saliva from normal and HD individuals. Saliva supernatants were used as-is (1x) or were concentrated 4-fold by vacuum centrifugation from 4 normal subjects (C5-C8) in (A), and in matched HD and control pairs (n=3) in (B). Supernatant fractions were separated by 7% SDS-PAGE and blotted onto nitrocellulose membranes for immunodetection using MAB2166 antibody (1:1,000) (A) or the 4E10 antibody (1:1,000) and beta-actin (1:1,000) (B). Gel image was acquired using a Fluorochem E imager.

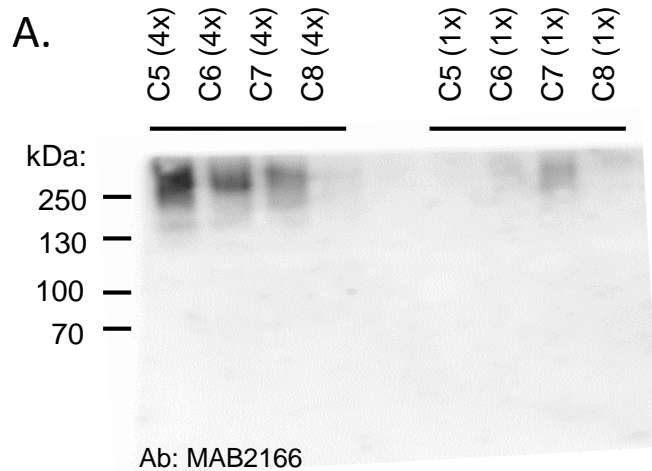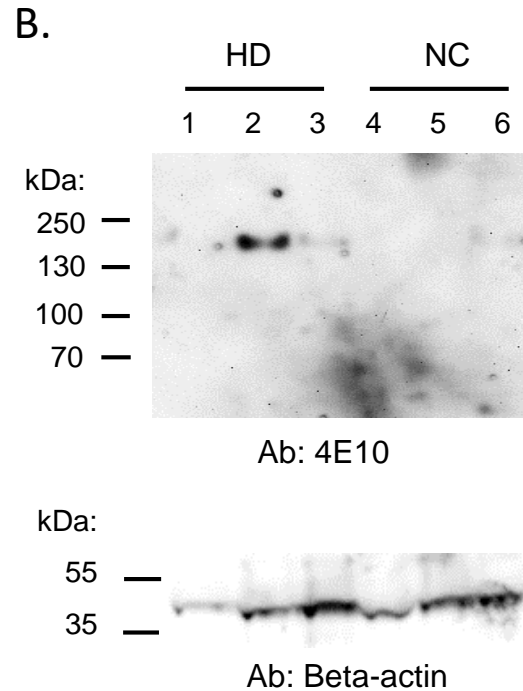

Figure S2. Levels of tHtt in medicated versus unmedicated HD patients. Levels of tHtt were determined by ELISA. The amount of tHtt (ng/ml) reported is relative to a recombinant Htt protein of 139 amino acids per the ELISA assay. We did not observe differences in salivary tHtt in HD patients who were taking anti-depressant or anti-anxiety medications compared to drug-free patients.

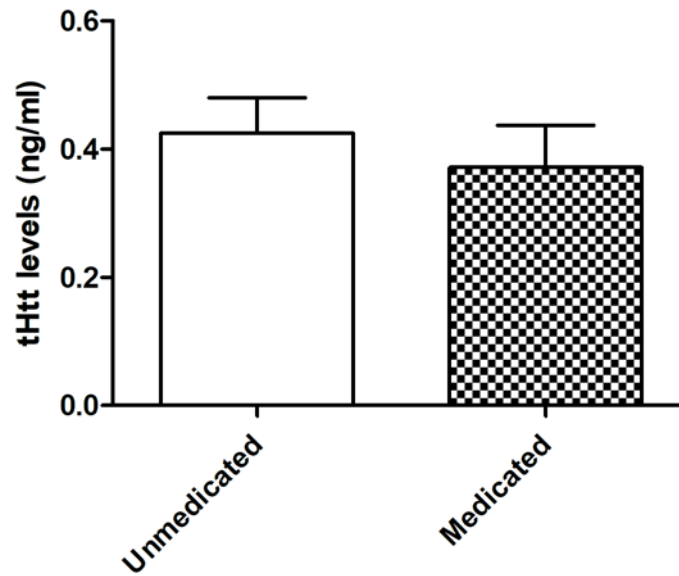

Figure S3. Linearity of dilution of tHtt in saliva. Levels of tHtt were determined by ELISA. The amount of tHtt (ng/ml) reported is relative to a recombinant Htt protein of 139 amino acids per the ELISA assay. The spiked-in recovery for the saliva matrix was 91.2% +/- 4.05% and the  $R^2$  value for linear regression = 0.976.

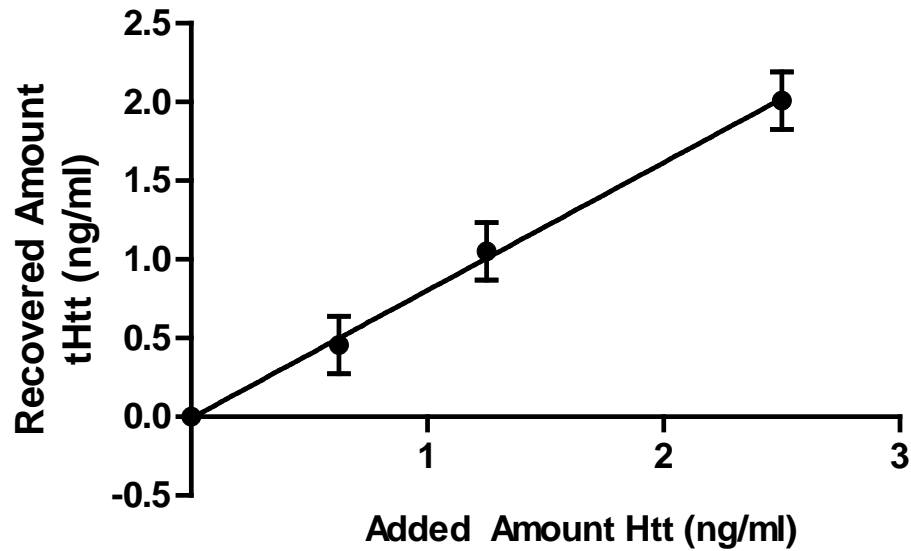

Table S1. Clinical data from the subjects used in this study.

| COHORT 1                  |      |              |                    |           |                  |         |         |        |        |        |       |              |
|---------------------------|------|--------------|--------------------|-----------|------------------|---------|---------|--------|--------|--------|-------|--------------|
|                           |      | CAG repeat # | Age of Onset (yrs) | PAO (yrs) | Langbehn # (yrs) | CAP     | DBS     | TFC    | MMSE   | Motor  | DCL   | tHtt (ng/ml) |
| <b>HD</b><br><b>N=23</b>  | Mean | 43.167       | 48.208             | 48.696    | 6.575            | 484.667 | 385.000 | 9.250  | 26.667 | 32.083 | 4.000 | 0.547        |
|                           | SD   | 3.031        | 11.538             | 14.294    | 3.772            | 85.144  | 92.240  | 2.005  | 2.808  | 13.227 | 0.000 | 0.079        |
|                           | Min  | 37.000       | 22                 | 30        | 3.930            | 220.440 | 99.000  | 6      | 20     | 9      | 4     | 0.043        |
|                           | Max  | 50.000       | 68                 | 70        | 23.000           | 678.700 | 577.500 | 13     | 30     | 63     | 4     | 1.530        |
| <b>LPM</b><br><b>N=9</b>  | Mean | 42.250       | 53.625             | 51.375    | 7.183            | 452.285 | 350.625 | 12.000 | 28.250 | 10.375 | 3.000 | 0.425        |
|                           | SD   | 2.315        | 14.667             | 14.071    | 1.357            | 30.338  | 41.552  | 1.195  | 1.832  | 3.926  | 0.926 | 0.112        |
|                           | Min  | 40.000       | 36                 | 38        | 5.14             | 396.36  | 297.00  | 10     | 25     | 6      | 2     | 0.048        |
|                           | Max  | 47.000       | 71                 | 70        | 8.98             | 485.68  | 414.00  | 13     | 30     | 17     | 4     | 1.240        |
| <b>EPM</b><br><b>N=10</b> | Mean | 41.222       |                    | 55.111    | 18.548           | 303.876 | 225.778 | 12.889 | 28.111 | 2.222  | 0.444 | 0.436        |
|                           | SD   | 3.420        |                    | 13.941    | 12.261           | 116.381 | 113.274 | 0.333  | 1.764  | 1.716  | 0.527 | 0.133        |
|                           | Min  | 38.000       |                    | 32        | 4.97             | 165.54  | 105.00  | 12     | 25     | 0      | 0     | 0.149        |
|                           | Max  | 48.000       |                    | 75        | 37.86            | 487.56  | 425.00  | 13     | 30     | 5      | 1     | 1.520        |
| <b>AR-</b><br><b>N=16</b> | Mean | 23.077       |                    |           |                  |         |         | 13.000 | 28.813 | 1.563  | 0.250 | 0.368        |
|                           | SD   | 6.157        |                    |           |                  |         |         | 0.000  | 1.601  | 1.153  | 0.447 | 0.073        |
|                           | Min  | 17.000       |                    |           |                  |         |         | 13     | 25     | 0      | 0     | 0.021        |
|                           | Max  | 33.000       |                    |           |                  |         |         | 13     | 30     | 4      | 1     | 0.935        |
| <b>NC</b><br><b>N=30</b>  | Mean |              |                    |           |                  |         |         | 12.667 | 28.611 | 2.444  | 0.278 | 0.340        |
|                           | SD   |              |                    |           |                  |         |         | 0.767  | 2.570  | 2.684  | 0.461 | 0.046        |
|                           | Min  |              |                    |           |                  |         |         | 10     | 20     | 0      | 0     | 0.028        |
|                           | Max  |              |                    |           |                  |         |         | 13     | 30     | 9      | 1     | 1.070        |

Table S1, cont. Clinical data from the subjects used in this study.

| COHORT 2    |      |              |                    |           |                  |         |         |        |        |        |       |              |
|-------------|------|--------------|--------------------|-----------|------------------|---------|---------|--------|--------|--------|-------|--------------|
|             |      | CAG repeat # | Age of Onset (yrs) | PAO (yrs) | Langbehn # (yrs) | CAP     | DBS     | TFC    | MMSE   | Motor  | DCL   | tHtt (ng/ml) |
| <b>HD</b>   | Mean | 42.250       | 52.750             | 58.875    | 6.231            | 485.938 | 376.688 | 8.500  | 24.429 | 33.500 | 4.000 | 0.593        |
| <b>N=14</b> | SD   | 2.816        | 11.732             | 13.632    | 1.268            | 46.951  | 58.990  | 3.505  | 2.507  | 11.314 | 0.000 | 0.077        |
|             | Min  | 40.000       | 28                 | 27        | 3.940            | 411.040 | 308.000 | 2      | 19     | 15     | 4     | 0.293        |
|             | Max  | 49.000       | 68                 | 70        | 8.220            | 567.580 | 499.500 | 13     | 27     | 52     | 4     | 1.320        |
| <b>LPM</b>  | Mean | 42.000       | 38.000             | 45.000    | 12.810           | 341.940 | 266.500 | 13.000 | 27.000 | 14.000 | 4.000 | 0.732        |
| <b>N=1</b>  | SD   |              |                    |           |                  |         |         |        |        |        |       |              |
|             | Min  |              |                    |           |                  |         |         |        |        |        |       |              |
|             | Max  |              |                    |           |                  |         |         |        |        |        |       |              |
| <b>EPM</b>  | Mean | 41.400       |                    | 52.667    | 20.085           | 323.995 | 245.733 | 13.000 | 28.333 | 1.933  | 0.467 | 0.462        |
| <b>N=16</b> | SD   | 1.724        |                    | 12.838    | 15.452           | 83.306  | 75.765  | 0.000  | 1.496  | 1.831  | 0.640 | 0.055        |
|             | Min  | 38.000       |                    | 35        | 7.16             | 165.54  | 108.50  | 13     | 25     | 0      | 0     | 0.106        |
|             | Max  | 44.000       |                    | 75        | 66.47            | 448.32  | 360.00  | 13     | 30     | 6      | 2     | 0.881        |
| <b>AR-</b>  | Mean | 19.800       |                    |           |                  |         |         | 13.000 | 28.400 | 0.800  | 0.200 |              |
| <b>N=13</b> | SD   | 3.834        |                    |           |                  |         |         | 0.000  | 1.517  | 1.304  | 0.447 |              |
|             | Min  | 17.000       |                    |           |                  |         |         | 13     | 26     | 0      | 0     |              |
|             | Max  | 26.000       |                    |           |                  |         |         | 13     | 30     | 3      | 1     |              |
| <b>NC</b>   | Mean |              |                    |           |                  |         |         | 12.909 | 28.727 | 1.909  | 0.182 | 0.378        |
| <b>N=14</b> | SD   |              |                    |           |                  |         |         | 0.302  | 0.905  | 1.814  | 0.405 | 0.068        |
|             | Min  |              |                    |           |                  |         |         | 12     | 27     | 0      | 0     | 0.029        |
|             | Max  |              |                    |           |                  |         |         | 13     | 30     | 5      | 1     | 0.729        |

HD, Huntington's disease; LPM, late pre-manifest; EPM, early pre-manifest; AR-, at-risk, gene negative; NC, normal controls.

PAO, paternal age of onset; CAP, normalized CAG Age Product; DBS, disease burden score; TFC, total functional capacity score.

MMSE, mini-mental state exam; Motor, motor symptom score; DCL, diagnostic confidence level.

"Langbehn #" is based on a formula that estimates years to onset in HD (Langbehn DR et al., Clin Genet. 65:267-77, 2004).
